# Supplementary material for: Ligand dependent restoration of human TLR3 signaling and death in p53 mutant cells
Source: PubMed Central journal article supplement (PMC5308678; doi:10.18632/oncotarget.11210), 2016-08-11
Supplement: oncotarget-07-61630-s001.pdf [file oncotarget-07-61630-s001.pdf]

## Ligand dependent restoration of human TLR3 signaling and death in p53 mutant cells

### SUPPLEMENTARY FIGURES AND TABLES

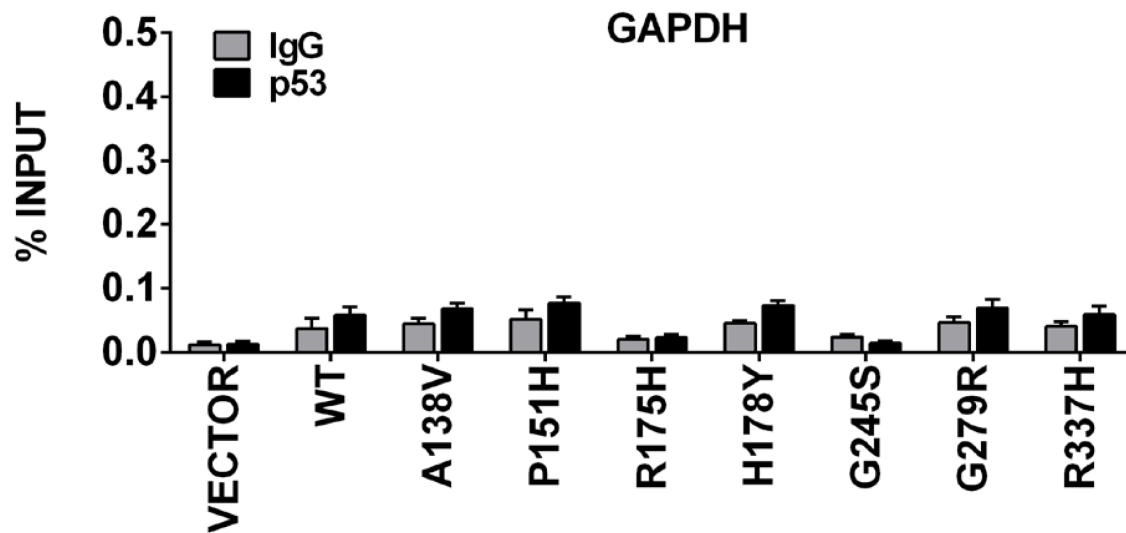

Supplementary Figure S1: Lack of p53 occupancy in the GAPDH promoter in HCT116 p53<sup>-/-</sup> cells transfected with WT or mutant p53 expression vectors.

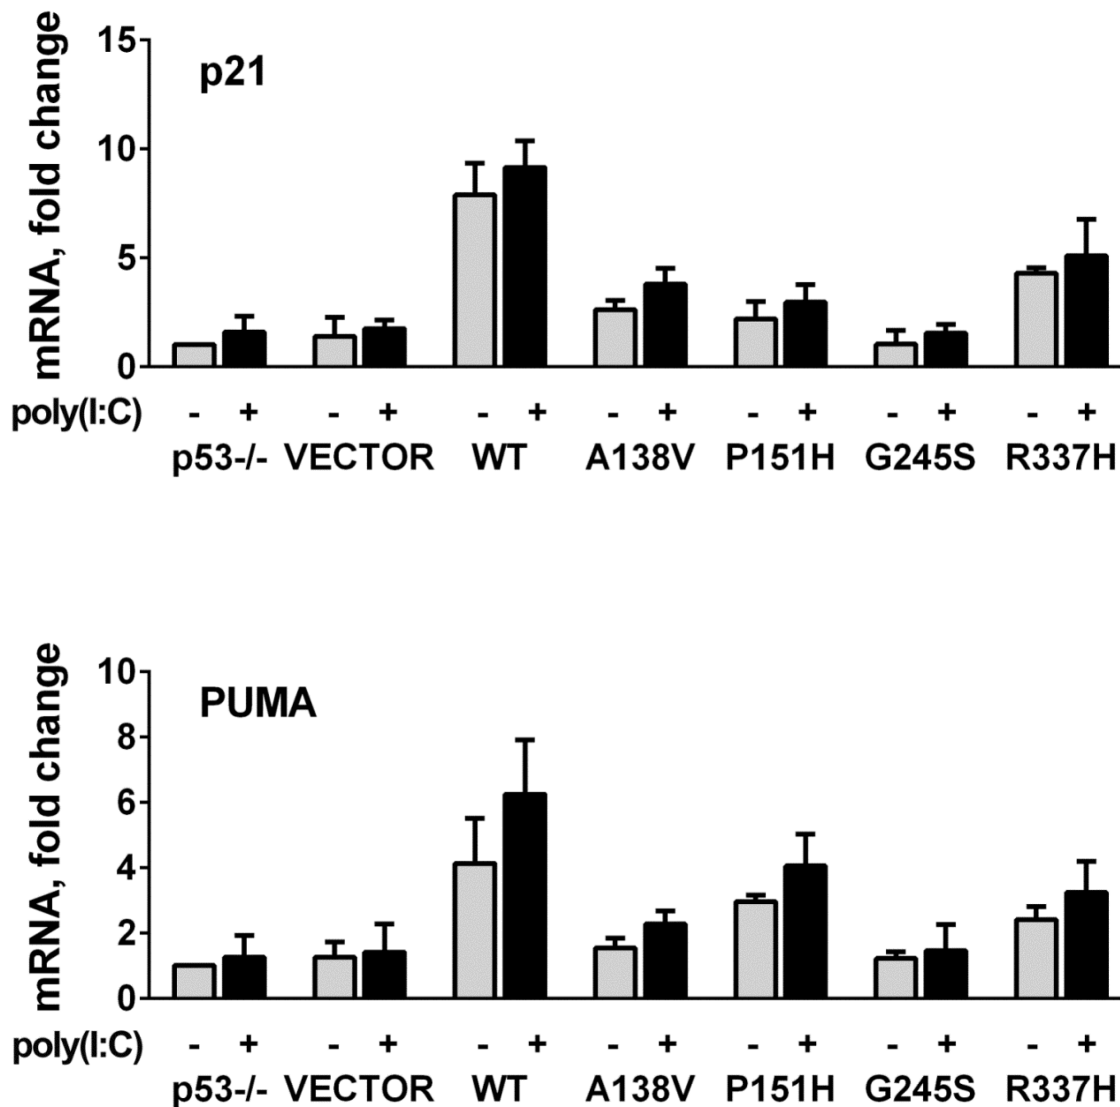

Supplementary Figure S2: Effect of poly(I:C) treatment on *p21* and *PUMA* expression in HCT116 p53-/- cells transfected with plasmids containing WT or mutant p53.

**A**

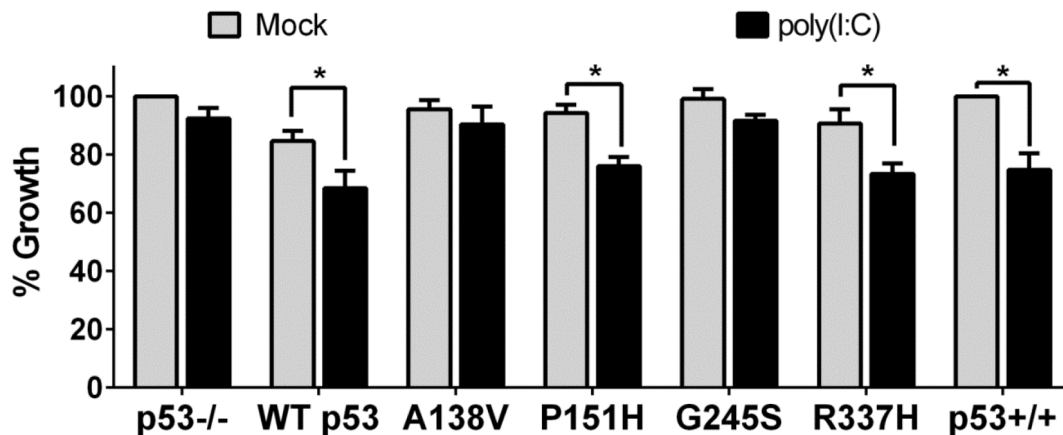

**B**

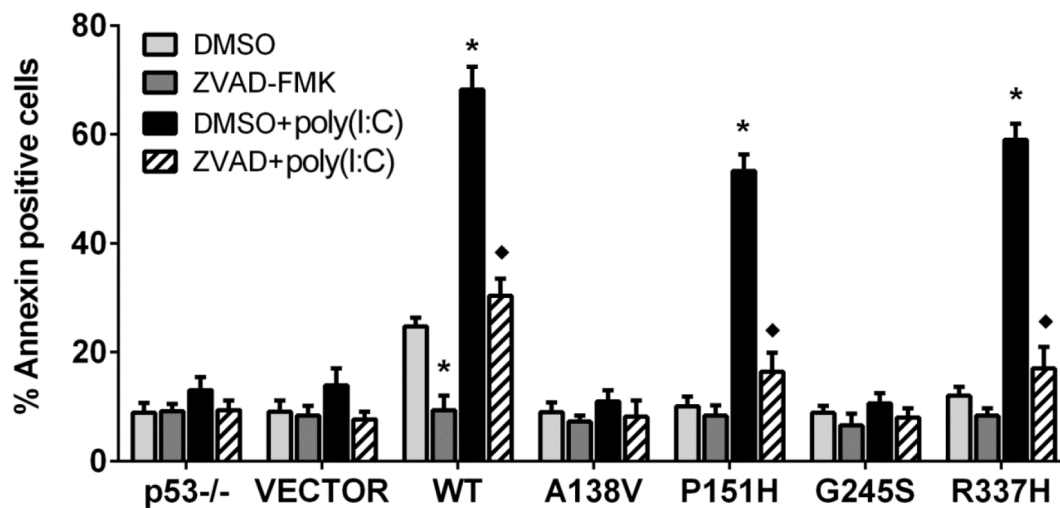

**Supplementary Figure S3: p53 mutants can enhance poly (I:C) induced TLR3 dependent cell death.** A. MTT based cell proliferation assay in HCT116 p53<sup>-/-</sup> cells transfected with WT and mutant p53 plasmids. After 24h, cells were treated with TLR3 ligand poly(I:C) (5µg/ mL). MTT assay was run 24h later. B. Pan-caspase inhibitor z-VAD-fmk inhibits poly(I:C) induced apoptosis as analyzed by Annexin V/PI assay. \* p<0.001 relative to DMSO; ♦ p<0.001 relative to DMSO plus poly(I:C).

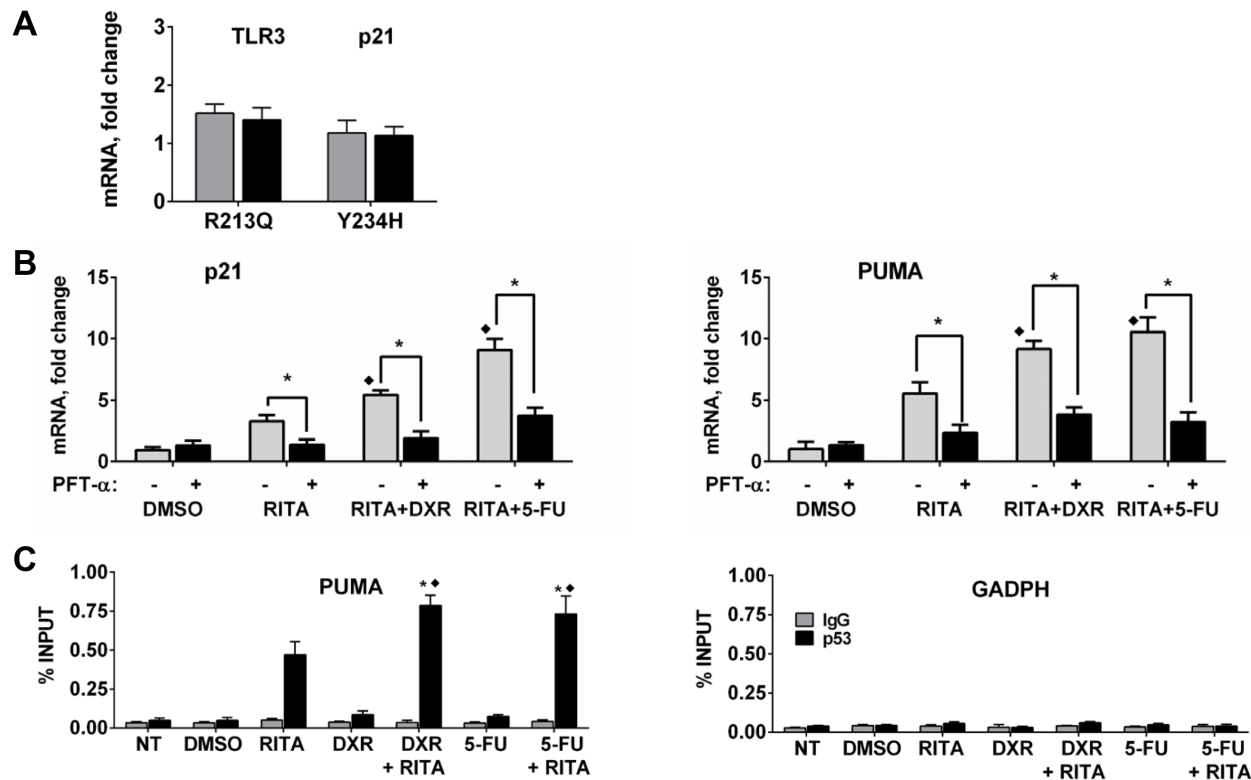

**Supplementary Figure S4:** A. R213Q and Y234H p53 mutants can not induce *TLR3* and *p21* expression determined by qPCR, when expressed in p53 null HCT116 cells. B. Restoration of mutant p53 transcriptional function by RITA in RAJI cells increases along with and DXR and 5-FU to modulate the expression of *p21* and *PUMA* (B) while pretreatment of cells with the p53 inhibitor PFT- $\alpha$  (10 $\mu$ M) abolishes RITA effect. C. RITA treatment rescued p53 mutant binding on the PUMA promoter, as determined by ChIP-PCR. GADPH control for binding. \* denotes  $p < 0.001$  and “♦” denotes  $< 0.001$  relative to RITA treatment alone.

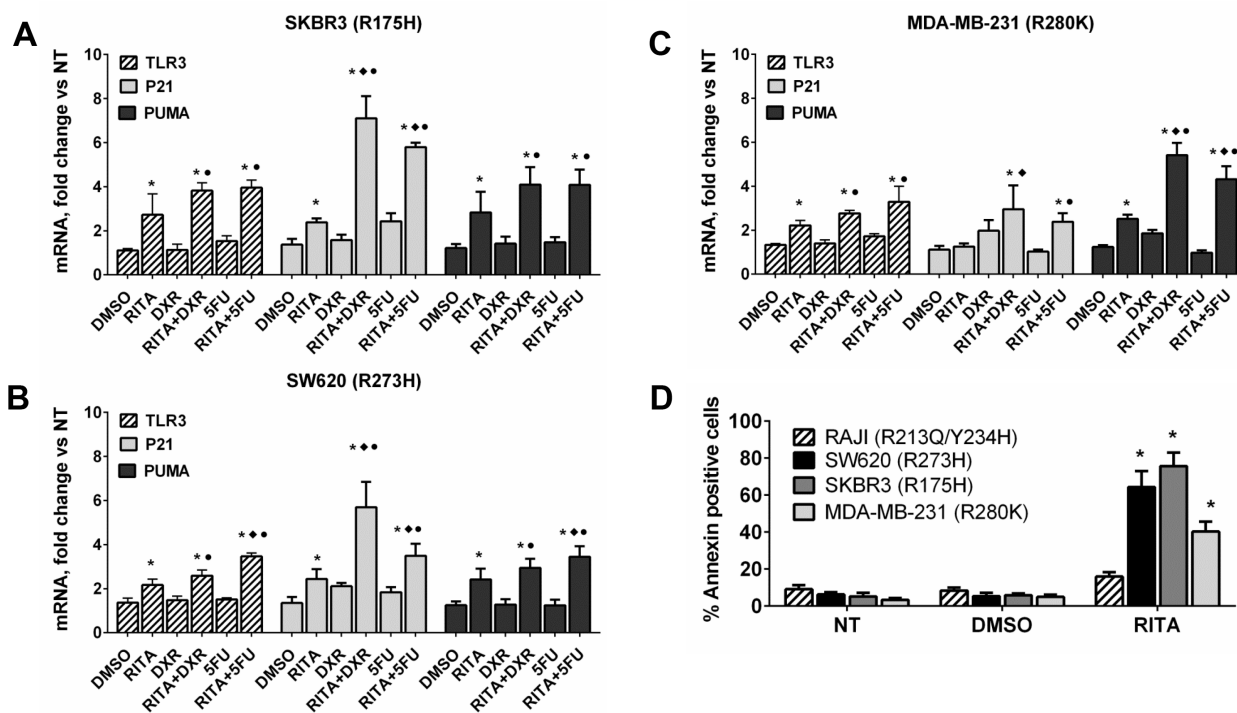

**Supplementary Figure S5:** A-C. p53 reactivating molecule RITA rescues *TLR3*, *p21* and *PUMA* gene expression in a p53 mutant cell lines harboring different p53 loss of function alleles. Cell lines were treated for 24h with RITA (1  $\mu$ M) in presence or absence of the chemotherapeutic agents DXR (0.5  $\mu$ M) or 5FU (300  $\mu$ M). DMSO was used as vehicle. mRNA levels of *TLR3*, *p21* and *PUMA* were determined by qPCR. **D.** RITA induces apoptosis in p53 mutant cell lines Apoptosis was analyzed 48 h after RITA (1 $\mu$ M) treatment by Annexin-V staining. Presented are the average and SD of 3 independent experiments. \* $p < 0.001$  relative to No treatment (NT) condition. “♦” and “●” denote  $< 0.001$  relative to RITA treatment alone and chemotherapeutic drug alone respectively.

**Supplementary Table S1: Functional description and tumor appearance frequencies for p53 mutants used in this study**

| MUTANT | IARC DATABASE R18 April 2016 <sup>c</sup> |                                    |           |            |
|--------|-------------------------------------------|------------------------------------|-----------|------------|
|        | FUNCTIONAL STATUS                         |                                    | Somatic † | Germinal † |
|        | Resnick lab <sup>a</sup>                  | Transactivation class <sup>b</sup> |           |            |
| S121F  | Functional (ST)                           | functional                         | 2         | 0          |
| V122A  | Altered                                   | non-functional                     | 0         | 0          |
| T125R  | Altered                                   | non-functional                     | 2         | 1          |
| M133T  | Altered                                   | non-functional                     | 7         | 25         |
| A138V  | Functional                                | partially functional               | 55        | 4          |
| P151H  | Altered                                   | non-functional                     | 42        | 0          |
| R175H  | Non-functional                            | non-functional                     | 1216      | 75         |
| H178Y  | Functional                                | partially functional               | 13        | 0          |
| P190L  | Altered                                   | partially functional               | 52        | 3          |
| Y220C  | Altered                                   | non-functional                     | 402       | 38         |
| M237I  | Altered                                   | non-functional                     | 196       | 2          |
| G245D  | Non-functional                            | non-functional                     | 162       | 8          |
| G245S  | Non-functional                            | non-functional                     | 456       | 40         |
| V272L  | Functional                                | non-functional                     | 52        | 1          |
| R273C  | Non-functional                            | non-functional                     | 707       | 35         |
| R273H  | Non-functional                            | non-functional                     | 858       | 63         |
| C277W  | Altered                                   | non-functional                     | 6         | 0          |
| G279E  | Non-functional                            | non-functional                     | 53        | 0          |
| G279R  | Altered                                   | non-functional                     | 9         | 1          |
| R280K  | Non-functional                            | non-functional                     | 75        | 1          |
| N288K  | Functional (ST)                           | functional                         | 2         | 0          |
| R337C  | Altered                                   | non-functional                     | 20        | 8          |
| R337H  | Altered                                   | partially functional               | 4         | 127        |
| L344P  | Non-functional                            | non-functional                     | 2         | 9          |
| N345S  | Altered                                   | functional                         | 0         | 0          |

<sup>a</sup> Assessment of transactivation capacities in yeast assays by Resnick et al., [4] and Jordan et al., [7]

<sup>b</sup> Assessment of transactivation capacities in yeast assays by Kato et al., [5]

<sup>c</sup> Petitjean A, Mathe E, Kato S, Ishioka C, Tavtigian SV, Hainaut P, Olivier M. Impact of mutant p53 functional properties on TP53 mutation patterns and tumor phenotype: lessons from recent developments in the IARC TP53 database. Hum Mutat. 2007; 28:622-629.

ST= Supertransactivation

† Number of reported allele-specific mutations in the R18 release of the IARC p53 mutation database: over 29000 somatic mutations, and 891 germline mutations

IARC TP53 DATABASE <http://p53.iarc.fr>

**Supplementary Table S2: mRNA fold-change values for *TLR* gene expression profiles in HCT116 p53<sup>-/-</sup> cells transfected with p53 mutants.** mRNA fold-change values for *TLR* gene expression profiles in SaOS2 cells transfected with p53 mutants.

See Supplementary File 1
